# Supplementary material
Source: Elsevier journal article supplement (http://www.macglo.com/download/mmc1.pdf)
Supplement: mmc1 [file mmc1.pdf]

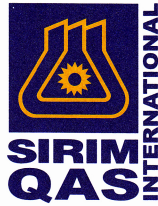

# CERTIFICATE

SIRIM QAS International hereby certifies that

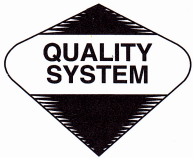

SIRIM

**MACGLOTECH STEEL SERVICE CENTRE SDN. BHD.**  
**(INCLUDING MACGLO STEEL SERVICE CENTRE SDN. BHD.)**  
**LOT 37901, BATU 6 1/4, JALAN KLINIK**  
**BUKIT KEMUNING, SEKSYEN 32**  
**40460 SHAH ALAM**  
**SELANGOR DARUL EHSAN**  
**MALAYSIA**

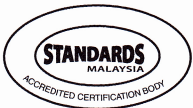

MS ISO/IEC 17021:2006  
QS 02121999 CB 01

has implemented a Quality Management System complying with

**ISO 9001 : 2008**

*Quality Management Systems - Requirements*

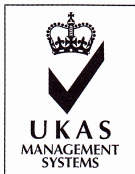

074

Scope of Certification

- 1) MANUFACTURE OF STAMPED METAL PRODUCTS.
- 2) SLITTING, CUTTING AND SHEARING OF STEEL COILS.

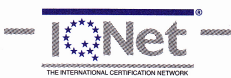

Issue date : 01 December 2010  
Validity period : 01 December 2010 - 26 October 2013  
Certification No. : AR 3418

**SIRIM QAS International Sdn. Bhd.**  
(Company No. 410334-X)  
1, Persiaran Dato' Menteri  
Section 2, P. O. Box 7035  
40911 Shah Alam  
Selangor Darul Ehsan  
MALAYSIA

Tel : 60-3-5544 6404  
Fax : 60-3-5544 6787

<http://www.sirim-qas.com.my>  
<http://www.malaysiancertified.com.my>

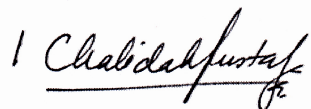

**Khalidah Mustafa**  
Managing Director  
SIRIM QAS International Sdn. Bhd.



**Dato' Ir. Hj. Yahaya Ahmad**  
Chairman  
SIRIM QAS International Sdn. Bhd.
